# Supplementary material for: Human cytomegalovirus (CMV) dysregulates neurodevelopmental pathways in cerebral organoids
Source: PubMed Central journal article supplement (PMC10951402; doi:10.1038/s42003-024-05923-1), 2024-03-19
Supplement: 42003_2024_5923_MOESM2_ESM.pdf [file 42003_2024_5923_MOESM2_ESM.pdf]

## Description of Additional Supplementary Files

**File name:** Supplementary Data 1

**Description:** Differentially expressed genes in CMV-infected cerebral organoids relative to mock.

**File name:** Supplementary Data 2

**Description:** Significantly over-represented GO terms in DEGs in CMV-infected cerebral organoids relative to mock.

**File name:** Supplementary Data 3

**Description:** KEGG pathways over-represented in CMV-infected organoids relative to mock.

**File name:** Supplementary Data 4

**Description:** Differentially expressed genes in CMV-infected cerebral organoids relative to mock in DYRK and SHH pathways.

**File name:** Supplementary Data 5

**Description:** Overlapping differentially expressed genes with SFARI database.

**File name:** Supplementary Data 6

**Description:** Disease enrichment differentially expressed gene dataset using the DisGeNET database.
